# Supplementary material
Source: PubMed Central journal article supplement (PMC3139827)
Supplement: NIHMS276575-supplement-Supplementary_Data.pdf [file NIHMS276575-supplement-Supplementary_Data.pdf]

# Web-based Supplementary Materials for “Additive Mixed Effect Model for Clustered Failure Time Data” by Jianwen Cai and Donglin Zeng

## Web Appendix

Technical conditions for Theorems 1 and 2 To establish the asymptotic distributions of  $(\widehat{\beta}, \widehat{\theta})$  and  $\widehat{\Lambda}$ , we need the following conditions, where any subscript 0 means the true values.

(C.1) For any constant  $\alpha$  and a deterministic function  $\mu(t)$  satisfying  $\alpha \neq 0$  or  $\mu(t) \neq 0$ ,  $P(\alpha^T \mathbf{X}_{ij}(t) + \mu(t) = 0, j = 1, \dots, n_i) < 1$ .

(C.2) The true parameter  $H_0(t) = \Lambda_0(t) + G(t; \theta_0)$  is a right-continuous increasing function and satisfies  $H_0(\tau) < \infty$  and  $P(C_{ij} \geq \tau, \text{ for some } j = 1, \dots, n_i) > 0$ .

(C.3) The true parameter  $\theta_0$  belongs to a known bounded set  $\Theta$ . Moreover,

$$E \left\{ \sum_{j \neq l, j, l=1}^{n_i} \int_0^\tau \int_0^\tau Y_{ij}(t) Y_{il}(s) \nabla_\theta Q(t, s; \theta) dt ds \right\}$$

is non-singular in a neighborhood of  $\theta_0$ , where  $\nabla_\theta Q(t, s; \theta)$  denotes the derivative of  $Q(t, s; \theta)$  with respect to  $\theta$ .

(C.4) The cluster size,  $n_i$ , is bounded and independent of  $Y_{ij}$ ,  $\mathbf{X}_{ij}$  and  $\Delta_{ij}$ . Additionally, the censoring time is assumed to be independent of  $T_{ij}$  and  $\xi_i$  given  $\mathbf{X}_{ij}$ .

Conditions (C.1) and (C.2) imply that the matrix  $n^{-1} \sum_{i=1}^n \sum_{j=1}^{n_i} \int_0^\tau Y_{ij}(t) \{\mathbf{X}_{ij}(t) - \bar{\mathbf{X}}(t)\}^{\otimes 2} dt$  is positive definite when  $n$  is large enough. Thus,  $\widehat{\beta}$  is well defined. This also implies that  $\Sigma$  is invertible. Otherwise, suppose  $\alpha^T \Sigma \alpha = 0$  for some constant vector  $\alpha$ . Then with probability one,  $\alpha^T \{\mathbf{X}_{ij}(t) - \mu(t)\} = 0$  for any  $t$  and  $j = 1, \dots, n_k$ . However, from condition (C.3) this implies  $\alpha = 0$ . Thus,  $\Sigma$  is positive definite. Additionally, condition (C.2) gives

$n^{-1} \sum_{i=1}^n \sum_{j=1}^{n_i} Y_{ij}(t)$  is bounded away from zero. On the other hand, condition (C.3) ensures that the estimating equation for  $\theta$  has a solution which is a consistent estimator for  $\theta_0$ .

### Asymptotic expansion of $\hat{\theta}$

To obtain the asymptotic distribution for  $\hat{\theta}$ , we perform the first-order Taylor expansion at  $\theta = \theta_0$  on the left-hand side of (7). It yields

$$\begin{aligned} & \mathbf{P}_n \left[ \sum_{j \neq l, j, l=1}^{n_i} \int_0^\tau \int_0^\tau Y_{ij}(t) Y_{il}(s) \{d\hat{\epsilon}_{ij}(t) d\hat{\epsilon}_{il}(s) - Q(t, s; \theta_0) dt ds\} \right] \\ & - \left[ E \left\{ \int_0^\tau \int_0^\tau Y_{ij}(t) Y_{il}(s) \nabla_\theta Q(t, s; \theta_0) dt ds \right\} + o_p(1) \right] (\hat{\theta} - \theta_0) = 0. \end{aligned}$$

Note

$$\begin{aligned} & \mathbf{P}_n \left[ \sum_{j \neq l, j, l=1}^{n_i} \int_0^\tau \int_0^\tau Y_{ij}(t) Y_{il}(s) \{d\hat{\epsilon}_{ij}(t) d\hat{\epsilon}_{il}(s) - Q(t, s; \theta_0) dt ds\} \right] \\ & = (\mathbf{P}_n - \mathbf{P}) \left[ \sum_{j \neq l, j, l=1}^{n_i} \int_0^\tau \int_0^\tau Y_{ij}(t) Y_{il}(s) \{d\epsilon_{ij0}(t) d\epsilon_{il0}(s) - Q(t, s; \theta_0) dt ds\} \right] \\ & - E \left[ \sum_{j \neq l, j, l=1}^{n_i} \int_0^\tau \int_0^\tau Y_{ij}(t) Y_{il}(s) \left\{ d\hat{H}(t) - dH_0(t) + \mathbf{X}_{ij}(t)^T (\hat{\boldsymbol{\beta}} - \boldsymbol{\beta}_0) dt \right\} d\epsilon_{il0}(s) \right] \\ & - E \left[ \sum_{j \neq l, j, l=1}^{n_i} \int_0^\tau \int_0^\tau Y_{ij}(t) Y_{il}(s) d\epsilon_{ij0}(t) \left\{ d\hat{H}(s) - dH_0(s) + \mathbf{X}_{il}(t)^T (\hat{\boldsymbol{\beta}} - \boldsymbol{\beta}_0) ds \right\} \right]. \end{aligned}$$

Thus, from equations (A.1) and (A.2), we obtain

$$\hat{\theta} - \theta_0 = (\mathbf{P}_n - \mathbf{P}) S_\theta(\mathbf{O}_i) + o_p(n^{-1/2}),$$

where

$$\begin{aligned} S_\theta(\mathbf{O}_i) & = \left[ E \left\{ \sum_{j \neq l, j, l=1}^{n_i} \int_0^\tau \int_0^\tau Y_{ij}(t) Y_{il}(s) \nabla_\theta Q(t, s; \theta_0) dt ds \right\} \right]^{-1} \\ & \times \left\{ \sum_{j \neq l, j, l=1}^{n_i} \int_0^\tau \int_0^\tau Y_{ij}(t) Y_{il}(s) \{d\epsilon_{ij0}(t) d\epsilon_{il0}(s) - Q(t, s; \theta_0) dt ds\} \right. \\ & - E \left[ \sum_{j \neq l, j, l=1}^{n_i} \int_0^\tau \int_0^\tau Y_{ij}(t) Y_{il}(s) \left\{ dS_H(\mathbf{O}_i; t) + \mathbf{X}_{ij}(t)^T S_\beta(\mathbf{O}_i) dt \right\} d\epsilon_{il0}(s) \right] \\ & \left. - E \left[ \sum_{j \neq l, j, l=1}^{n_i} \int_0^\tau \int_0^\tau Y_{ij}(t) Y_{il}(s) d\epsilon_{ij0}(t) \left\{ dS_H(\mathbf{O}_i; s) + \mathbf{X}_{il}(t)^T S_\beta(\mathbf{O}_i) ds \right\} \right] \right\}. \end{aligned}$$

Consistent estimation of asymptotic variance. Clearly, the asymptotic covariance of  $(\widehat{\boldsymbol{\beta}}, \widehat{H}, \widehat{\theta})$  is given by the covariance of the corresponding influence function  $(\mathbf{S}_{\boldsymbol{\beta}}, S_H, S_{\theta})$ . Thus, a consistent estimator of the asymptotic covariance can be obtained from the empirical covariance of  $(\widehat{\mathbf{S}}_{\boldsymbol{\beta}}, \widehat{S}_H, \widehat{S}_{\theta})$ , where the latter are the consistent estimators of  $(\mathbf{S}_{\boldsymbol{\beta}}, S_H, S_{\theta})$ . Particularly, we can choose

$$\widehat{\mathbf{S}}_{\boldsymbol{\beta}}(\mathbf{O}_i) = \left[ n^{-1} \sum_{i=1}^n \sum_{j=1}^{n_i} \int_0^{\tau} Y_{ij}(t) \{ \mathbf{X}_{ij}(t) - \overline{\mathbf{X}}(t) \}^{\otimes 2} dt \right]^{-1} \sum_{j=1}^{n_i} \int_0^{\tau} Y_{ij}(t) \{ \mathbf{X}_{ij}(t) - \overline{\mathbf{X}}(t) \} d\widehat{\epsilon}_{ij}(t),$$

$$\widehat{S}_H(\mathbf{O}_i; s) = \int_0^s \frac{\sum_{j=1}^{n_i} Y_{ij}(t) d\widehat{\epsilon}_{ij}(t)}{n^{-1} \sum_{i=1}^n \sum_{j=1}^{n_i} Y_{ij}(t)} - \int_0^s \overline{\mathbf{X}}(t)^T dt \widehat{\mathbf{S}}_{\boldsymbol{\beta}}(\mathbf{O}_i),$$

and

$$\begin{aligned} \widehat{S}_{\theta}(\mathbf{O}_i) &= \left\{ n^{-1} \sum_{i=1}^n \sum_{j \neq l, j, l=1}^{n_i} \int_0^{\tau} \int_0^{\tau} Y_{ij}(t) Y_{il}(s) \nabla_{\theta} Q(t, s; \widehat{\theta}) dt ds \right\}^{-1} \\ &\times \left\{ \sum_{j \neq l, j, l=1}^{n_i} \int_0^{\tau} \int_0^{\tau} Y_{ij}(t) Y_{il}(s) \left\{ d\widehat{\epsilon}_{ij}(t) d\widehat{\epsilon}_{il}(s) - Q(t, s; \widehat{\theta}) dt ds \right\} \right. \\ &\quad \left. - n^{-1} \sum_{k=1}^n \left[ \sum_{j \neq l, j, l=1}^{n_k} \int_0^{\tau} \int_0^{\tau} Y_{kj}(t) Y_{kl}(s) \left\{ d\widehat{S}_H(\mathbf{O}_i; t) + \mathbf{X}_{kj}(t)^T \widehat{\mathbf{S}}_{\boldsymbol{\beta}}(\mathbf{O}_i) dt \right\} d\widehat{\epsilon}_{kl}(s) \right] \right. \\ &\quad \left. - n^{-1} \sum_{k=1}^n \left[ \sum_{j \neq l, j, l=1}^{n_k} \int_0^{\tau} \int_0^{\tau} Y_{kj}(t) Y_{kl}(s) d\widehat{\epsilon}_{kj}(t) \left\{ d\widehat{S}_H(\mathbf{O}_i; s) + \mathbf{X}_{kl}(t)^T \widehat{\mathbf{S}}_{\boldsymbol{\beta}}(\mathbf{O}_i) ds \right\} \right] \right\}. \end{aligned}$$
